# Supplementary material
Source: publisher figshare collection journal article supplement (https://scielo.figshare.com/articles/dataset/_/7045826)
Supplement: Supplementary file 1 [file Table_1.xls]

## Sheet: Table_1
<b>Expert opinion</b>	<b>STV<br> Number of items (%)</b>	<b>SBTV<br> Number of items (%)</b>
Unchanged	33 (80.48)	31 (75.60)
Slightly changed	8 (19.51)	10 (24.39)
Heavily changed	0	0
