# Supplementary material
Source: publisher figshare collection journal article supplement (https://scielo.figshare.com/articles/dataset/_/7045826)
Supplement: Supplementary file 2 [file Table_2.xls]

## Sheet: Table_2
<b>Original version</b>	<b>Synthesis of translations</b>	<b>Final version</b>
Oxygen treatment and/or suctioning	<em>Tratamento com oxig&#234;nio e/ou suc&#231;&#227;o</em>	<em>Tratamento com oxig&#234;nio e/ou aspira&#231;&#227;o de vias a&#233;reas</em>
Continuous positive airway pressure for all or part of the day and/or mechanical ventilatory support for part of the day	<em>Tratamento cont&#237;nuo com press&#227;o positiva nas vias a&#233;reas durante todo ou parte do dia e/ou suporte ventilat&#243;rio mec&#226;nico durante parte do dia</em>	<em>CPAP durante todo ou parte do dia e/ou suporte ventilat&#243;rio mec&#226;nico durante parte do dia</em>
≥ 2 limbs functionally impaired	<em>&#8805; 2 membros com defici&#234;ncia funcional</em>	<em>Dois ou mais membros com defici&#234;ncia funcional</em>
