# Supplementary material
Source: publisher figshare collection journal article supplement (https://scielo.figshare.com/articles/dataset/_/7045826)
Supplement: Supplementary file 3 [file Table_3.xls]

## Sheet: Table_3
<b></b>	<b>Normal<br> (Pontos = 1)</b>	<b>Disfunção leve<br> (Pontos = 2)</b>	<b>Disfunção moderada<br> (Pontos = 3)</b>	<b>Disfunção grave<br> (Pontos = 4)</b>	<b>Disfunção muito grave<br> (Pontos = 5)</b>
Estado mental	Períodos normais de sono/vigília; responsividade adequada	Sonolento, mas suscetível ao ruído/toque/ movimento e/ou períodos de não responsividade social	Letárgico e/ou irritável	Despertar mínimo aos estímulos (estupor)	Coma não responsivo, e/ou estado vegetativo
Funcionalidade sensorial	Audição e visão intactas e responsivo ao toque	Suspeita de perda auditiva ou visual	Não reativo a estímulos auditivos ou a estímulos visuais	Não reativo a estímulos auditivos ou a estímulos visuais	Respostas anormais à dor ou ao toque
Comunicação	Vocalização apropriada, não chorando, expressividade facial ou gestos interativos	Diminuição da vocalização, expressão facial e/ou responsividade social	Ausência de comportamento de busca de atenção	Nenhuma demonstração de desconforto	Ausência de comunicação
Funcionamento motor	Movimentos corporais coordenados, controle muscular normal, e consciência da ação e da reação	1 membro com deficiência funcional	Dois ou mais membros com deficiência funcional	Controle deficiente da cabeça	Espasticidade difusa, paralisia ou postura de decerebração/decorticação
Alimentação	Todos os alimentos ingeridos por via oral com ajuda adequada para a idade	Nada por via oral ou necessidade de ajuda inadequada para a idade com a alimentação	Alimentação via oral e por tubo	Nutrição parenteral com administração por via oral ou por tubo	Nutrição parenteral exclusiva
Estado respiratório	Ar ambiente e sem suporte artificial ou dispositivos auxiliares	Tratamento com oxigênio e/ou aspiração de vias aéreas	Traqueostomia	CPAP durante todo ou parte do dia e/ou suporte ventilatório mecânico durante parte do dia	Suporte ventilatório mecânico durante todo o dia e toda a noite
