# Supplementary material
Source: publisher figshare collection journal article supplement (https://scielo.figshare.com/articles/dataset/_/7045826)
Supplement: Supplementary file 4 [file Table_4.xls]

## Sheet: Table_4
<b>Variable</b>	<b></b>
Age (months)	18 (1 - 156)
Male	14 (56)
Length of stay in the pediatric ICU	6.96 ± 7.03
Needed IMV in the pediatric ICU	15 (60)
Needed oxygen therapy	13 (52)
Needed a tracheostomy	0
Needed sedation in the pediatric ICU	6 (24)
Needed NMB in the pediatric ICU	2 (8)
Diagnosis for admission to the pediatric ICU
Cardiac surgery	11 (44)
Respiratory (pneumonia and bronchiolitis)	7 (2)
Sepsis (ARDS and diarrhea)	2 (8)
Abdominal surgery	2 (8)
Diarrhea	1 (4)
Leptospirosis	1 (4)
Ketoacidosis	1 (4)
FSS score	7.48 ± 2.08
